# Supplementary material for: Opa1 and Drp1 reciprocally regulate cristae morphology, ETC function, and NAD+ regeneration in KRas-mutant lung adenocarcinoma
Source: PubMed Central journal article supplement (PMC10265649; doi:10.1016/j.celrep.2022.111818), 2022-12-13
Supplement: NIHMS1903394-supplement-1.pdf [file NIHMS1903394-supplement-1.pdf]

**Cell Reports, Volume 41**

**Supplemental information**

**Opa1 and Drp1 reciprocally regulate cristae  
morphology, ETC function, and NAD<sup>+</sup>  
regeneration in KRas-mutant lung adenocarcinoma**

**Dane T. Sessions, Kee-Beom Kim, Jennifer A. Kashatus, Nikolas Churchill, Kwon-Sik Park, Marty W. Mayo, Hiromi Sesaki, and David F. Kashatus**

**A**

A549

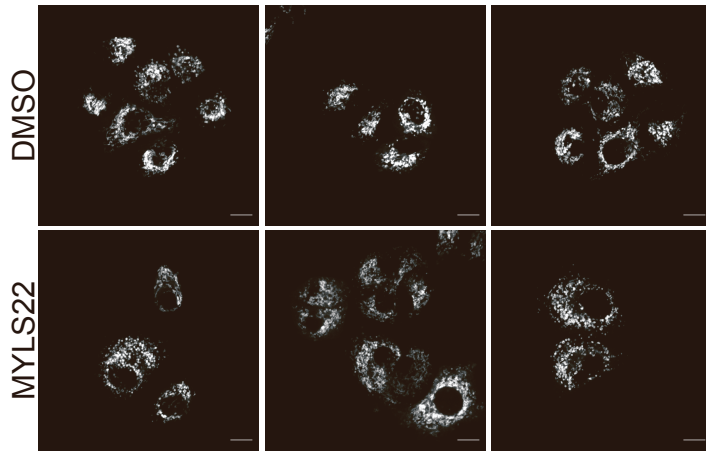**B**

MEFs

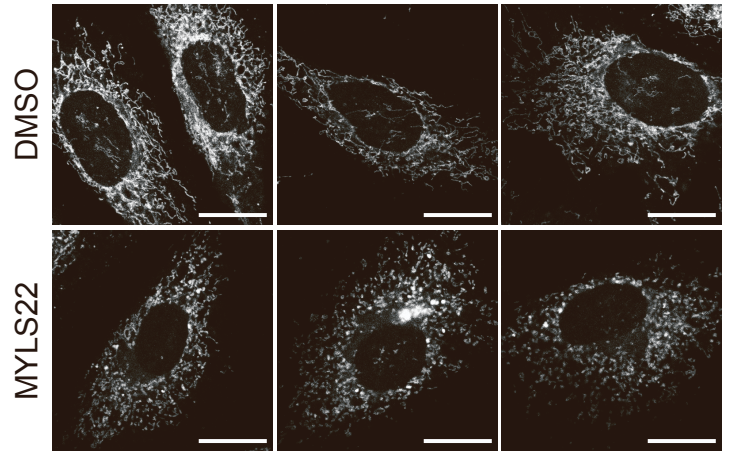

**Figure S1: Cells treated with Opa1 inhibitor MYLS22 demonstrate fragmented mitochondrial morphology. Related to Figure 1.**

A. Mitotracker Green-stained A549 cells treated with DMSO or 50  $\mu$ M MYLS22 for 72 hours. Scale = 10  $\mu$ m.

B. Mitotracker Green-stained MEFs treated with DMSO or 50  $\mu$ M MYLS22 for 72 hours. Scale = 20  $\mu$ m.

**A**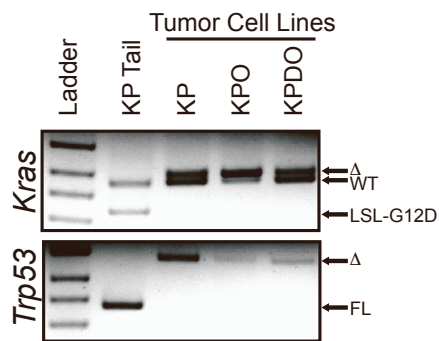

**Figure S2: GEMM-derived LUAD cells completely recombine *Kras*<sup>LSL-G12D</sup> and *Trp53*<sup>FL</sup> alleles. Related to Figure 3.**

A. *Kras* and *Trp53* PCR genotypes of KP mouse tail and one representative each of KP, KPO, and KPDO GEMM-derived cell lines.

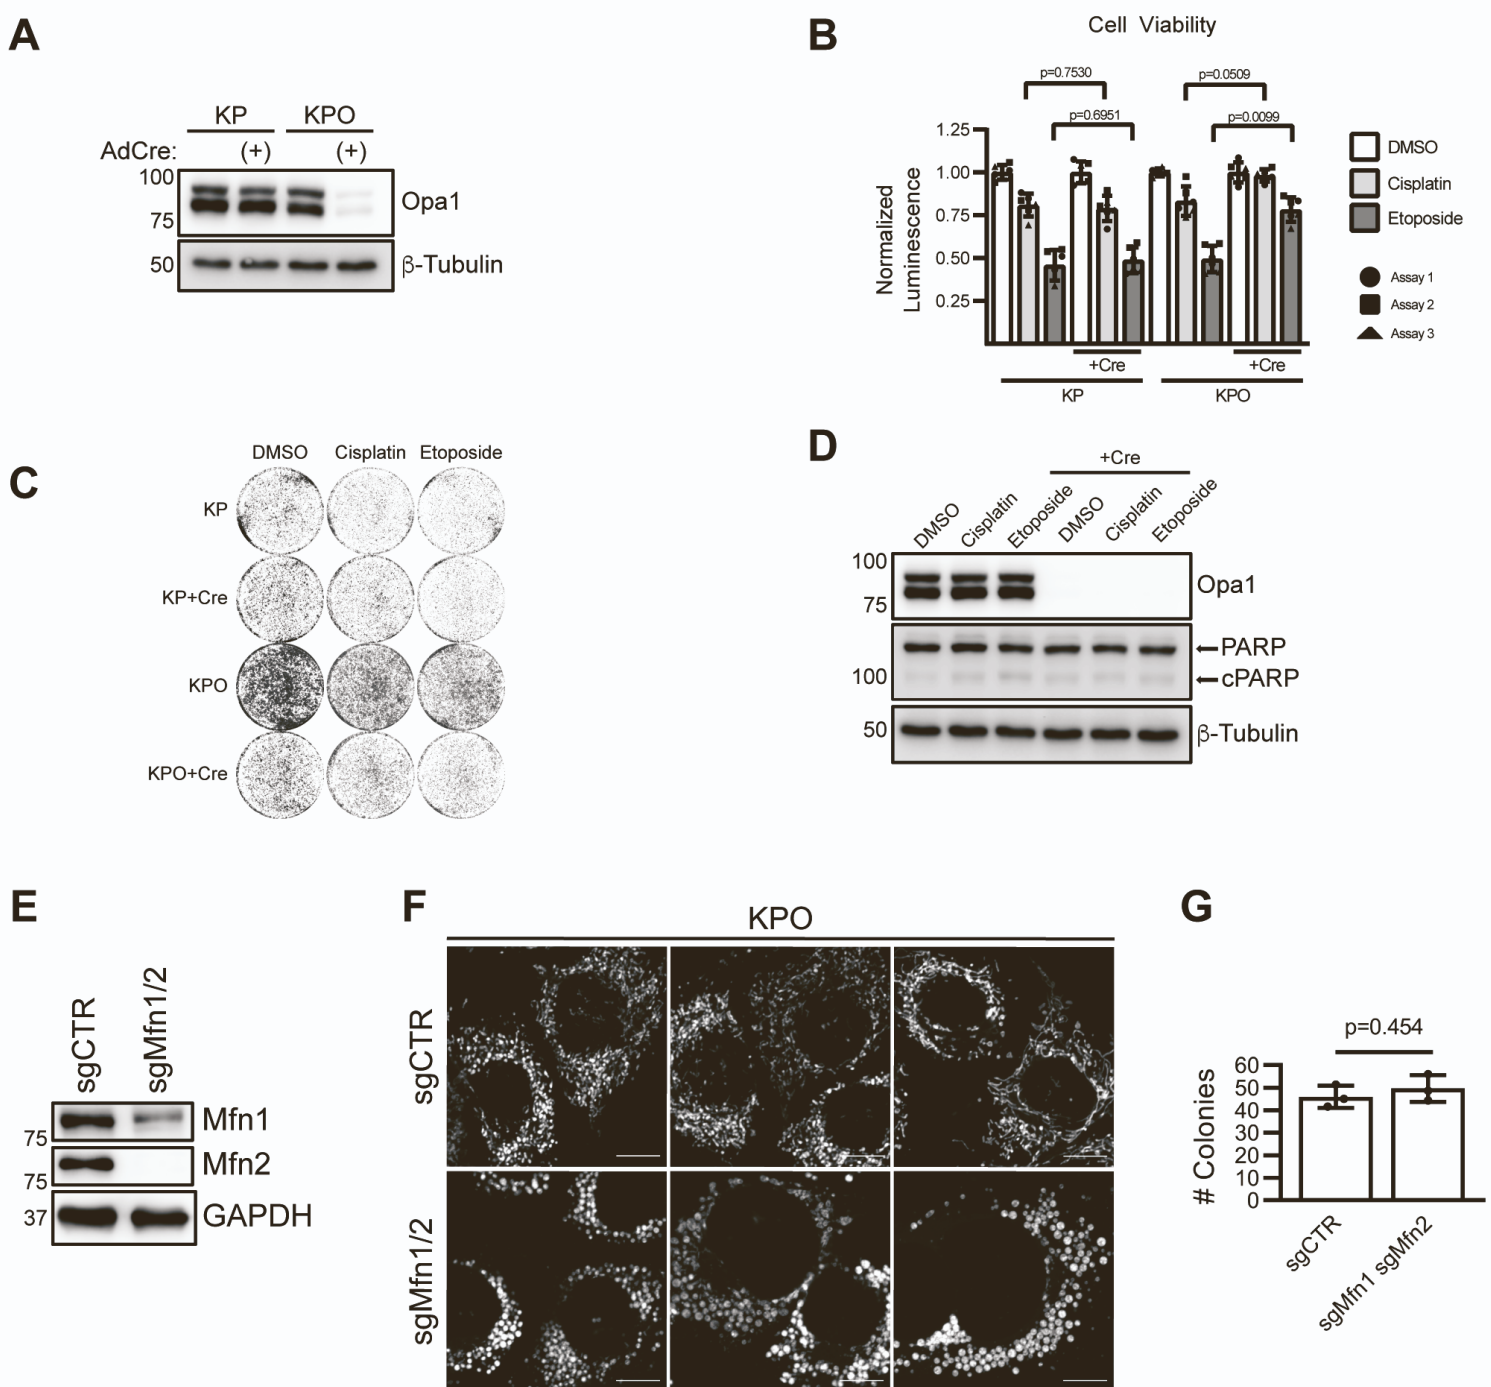

**Figure S3: Opa1 deletion does not inhibit LUAD growth by promoting apoptosis or inhibiting mitochondrial fusion. Related to Figure 4.**

A. Immunoblot of Opa1 in uninfected or AdCre-infected KP and KPO cells.

B. CellTiter-Glo cell viability of uninfected or AdCre-infected KP and KPO cells treated with DMSO, cisplatin (2  $\mu$ M), or etoposide (2  $\mu$ M) for 48 hours. All technical replicates shown. n=3 independent experiments. Mean $\pm$ SD. Student's T-test.

C. Crystal violet staining of uninfected or AdCre-infected KP and KPO cells treated with DMSO, cisplatin (2  $\mu$ M), or etoposide (2  $\mu$ M) for 48 hours.

D. Immunoblot of Opa1 and PARP in uninfected or AdCre-infected KPO cells treated with DMSO, cisplatin (2  $\mu$ M), or etoposide (2  $\mu$ M) for 48 hours.

E. Immunoblot of Mfn1 and Mfn2 in clonal control (sgCTR) or clonal Mfn1 and Mfn2 CRISPR (sgMfn1/Mfn2) KPO cells (no Cre).

F. Mitotracker Green-stained control and Mfn1/2 CRISPR KPO cells. Scale = 10  $\mu$ m.

G. Colony formation of control and Mfn1/2 CRISPR KPO cells. Mean $\pm$ SD. Student's T-test.



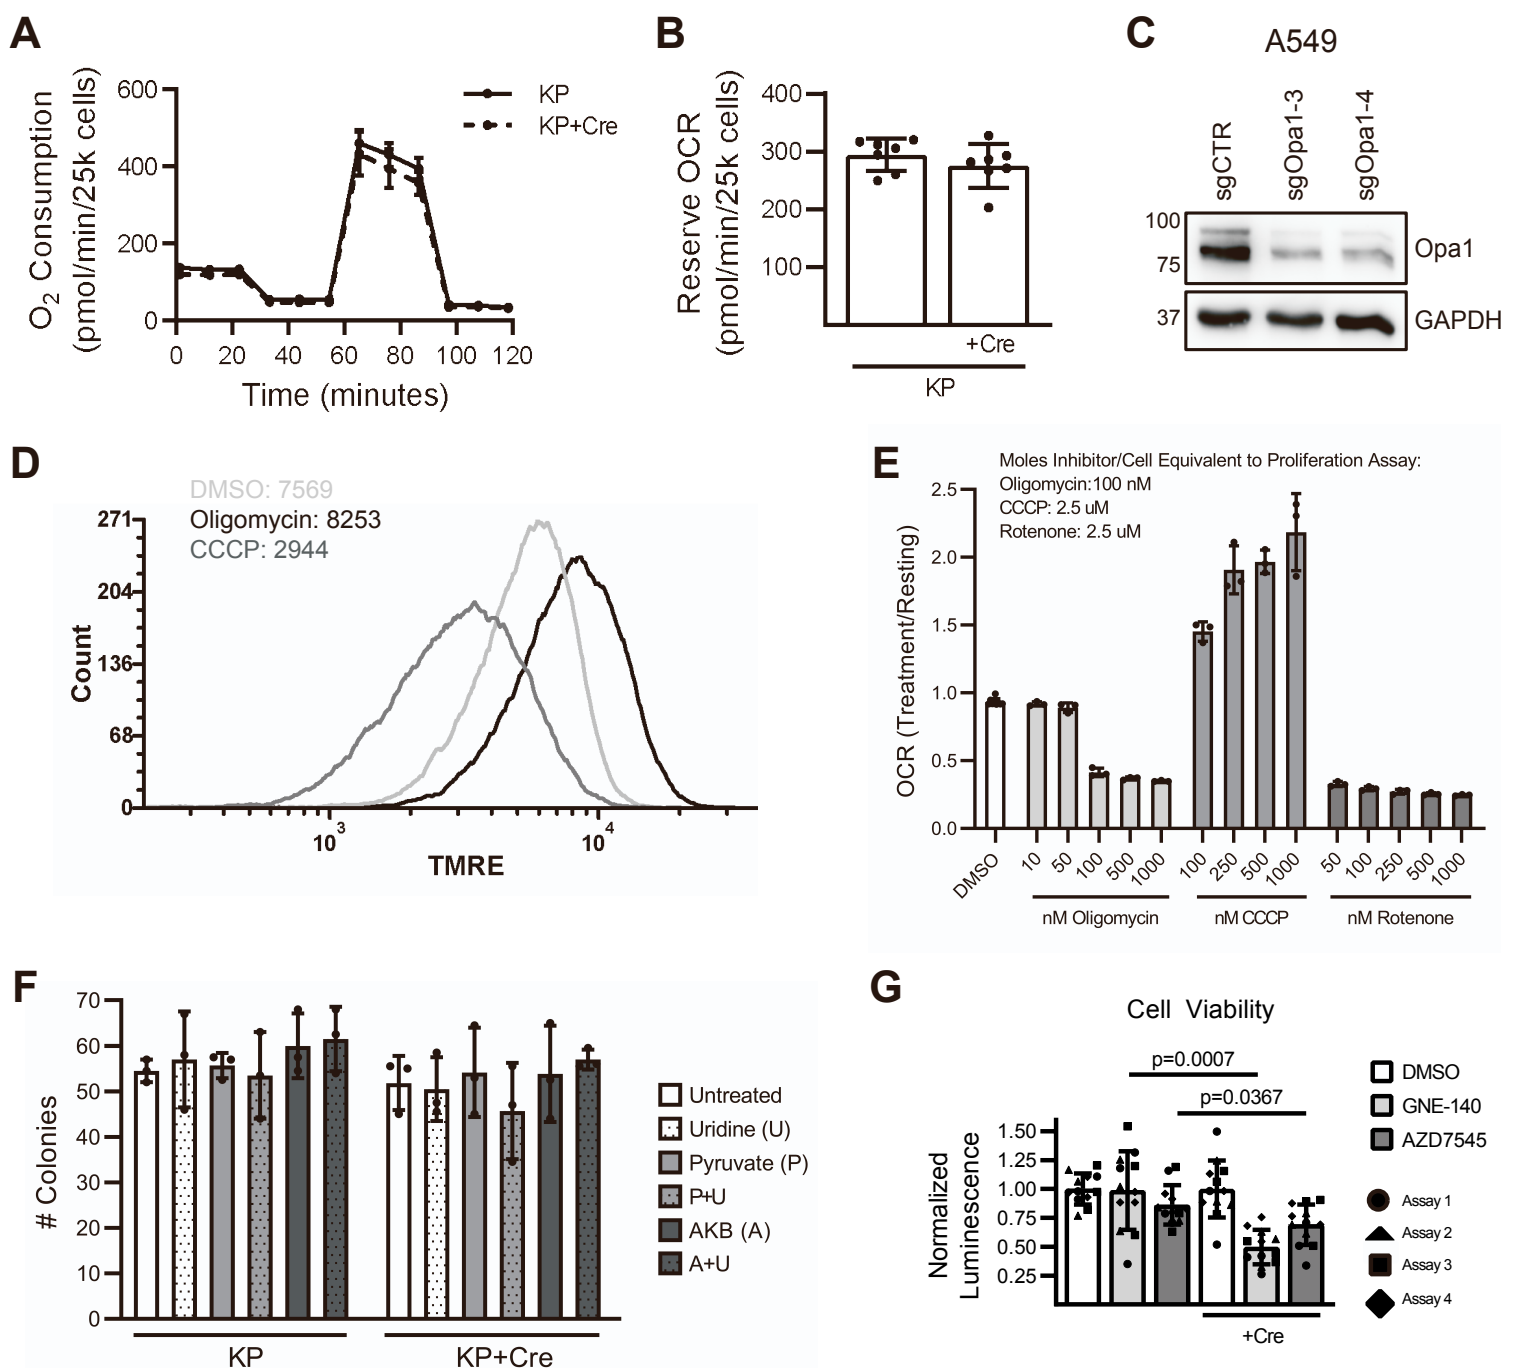

**Figure S4: Opa1 deletion inhibits LUAD respiration and sensitizes tumor cells to inhibition of cytoplasmic NAD<sup>+</sup> regeneration. Related to Figure 4.**

A. OCR of untreated or AdCre-infected KP cells. n=7 wells per cell condition. Mean±SD.

B. Reserve OCR of untreated or AdCre-infected KP cells. n=7 wells per condition. Mean±SD.

C. Immunoblot of Opa1 in control or two independent Opa1 CRISPR A549 cell lines.

D. TMRE flow cytometry of uninfected KPO cells treated with equal moles oligomycin/CCCP per cell as cellular accumulation experiment (Figure 4F). Cells gated only on live cell population (FSCxSSC). Values indicate median fluorescence intensity. n>20,000 cells per group.

E. Treated/resting OCR of uninfected KPO tumor cells with indicated of compounds. n=3 wells per condition. Mean±SD.

F. Colony formation in uninfected or AdCre-infected KP cells without treatment or treated with uridine (0.1 mg/mL), pyruvate (1 mM), alphaketobutyrate (AKB, 1 mM), or in combination. n=3 independent experiments.

G. CellTiter-Glo cell viability in uninfected or AdCre-infected KPO cells treated with DMSO, GNE-140 (5 μM), or AZD7545 (5 μM) for 48 hours. All technical replicates shown. n=4 independent experiments. Mean±SD. Student's T-test.

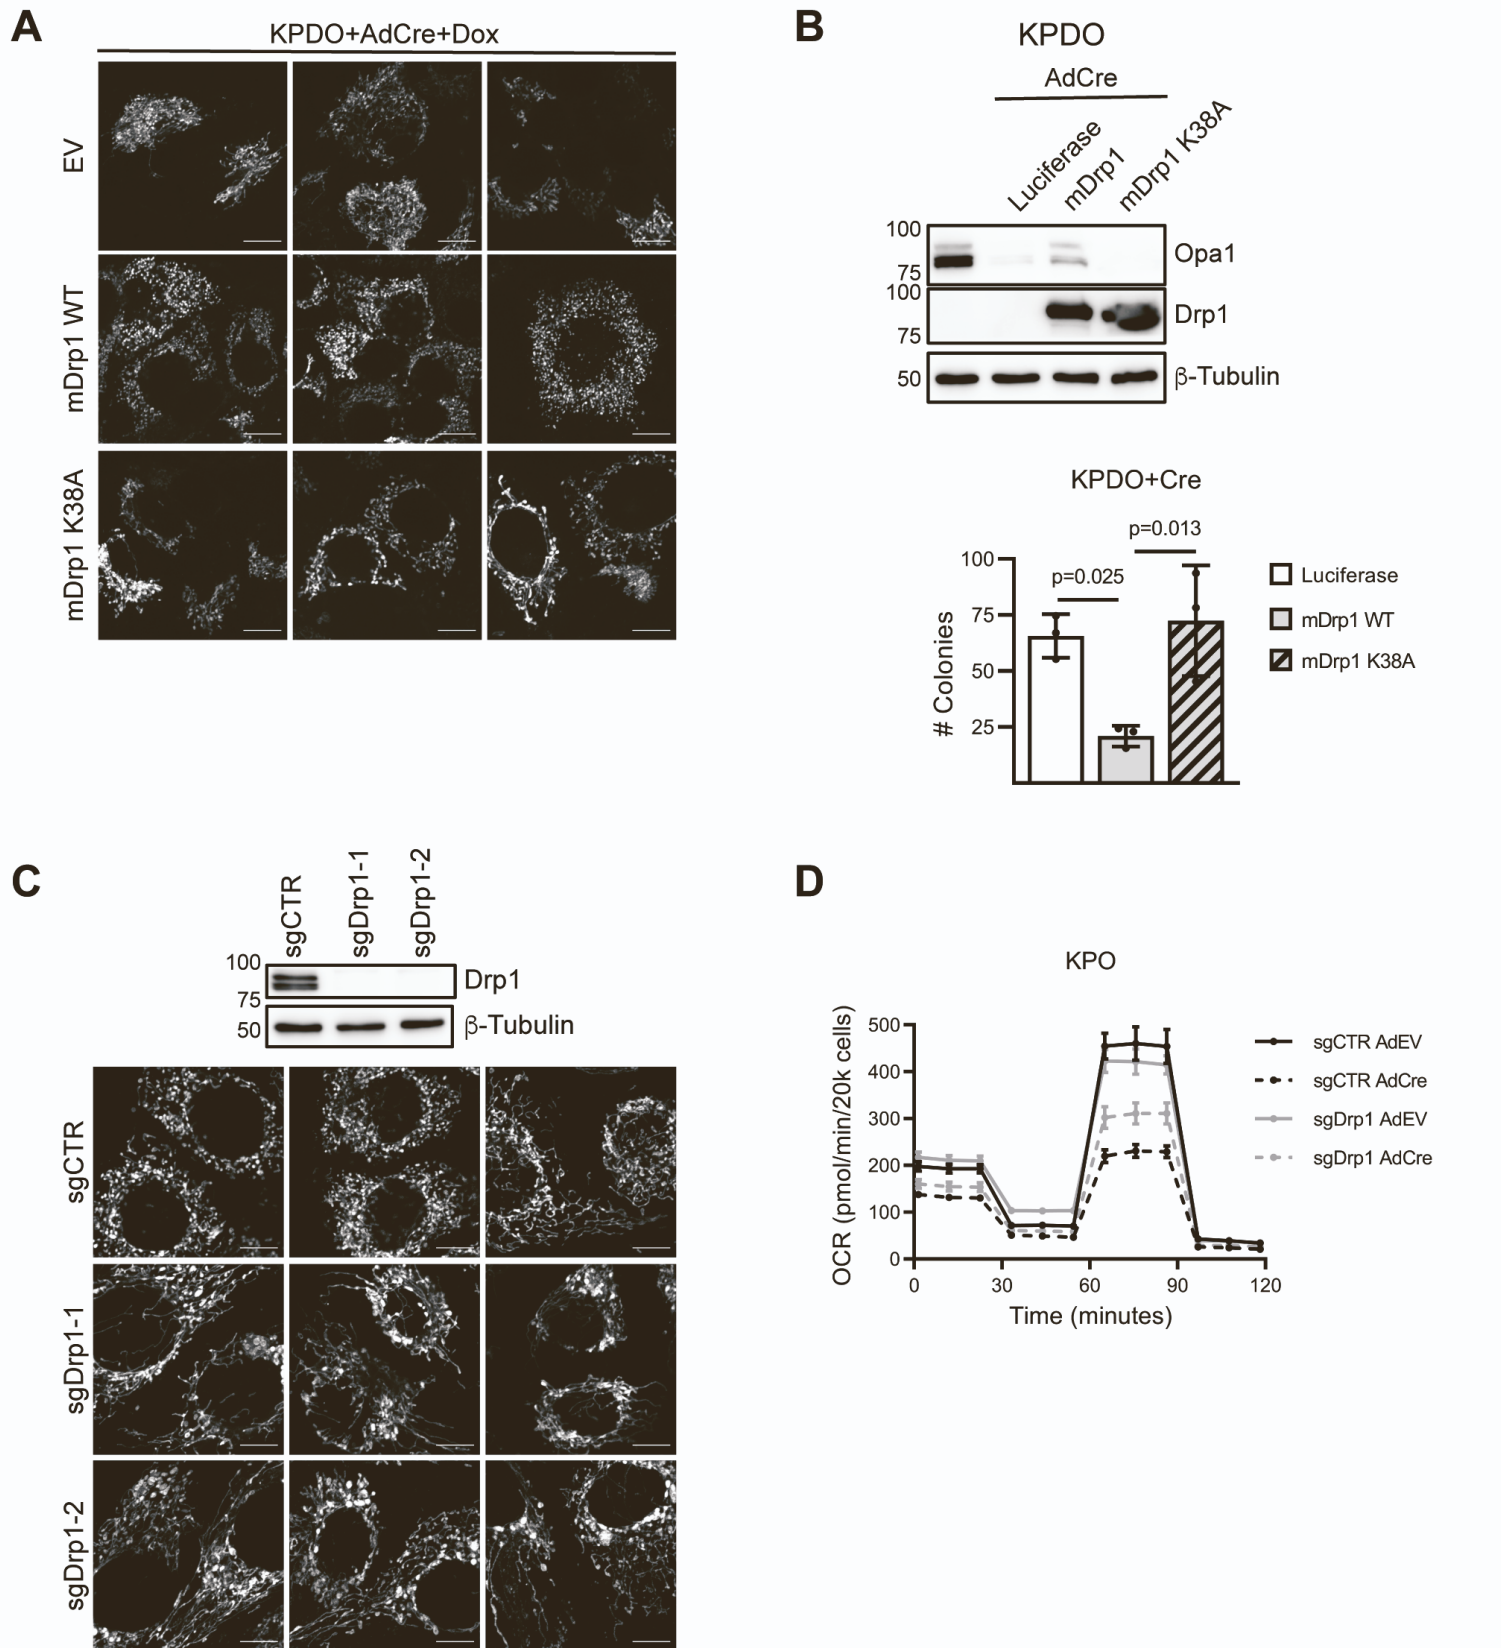

**Figure S5: Assessment of LUAD mitochondrial morphology and colony formation under Opa1 and/or Drp1 deletion. Related to Figure 5.**

A. Mitotracker Green-stained AdCre-infected KPDO cells with doxycycline-induced empty vector (EV), mDrp1WT, or mDrp1K38A. Scale = 10  $\mu$ m.

B. Immunoblot of Drp1 and Opa1 and colony formation in KPDO cells that deleted Drp1 but retained Opa1 in vivo and constitutively express luciferase, mDrp1WT, or mDrp1K38A. Mean  $\pm$  SD. One-way ANOVA + Sidak's multiple comparisons test.

C. Immunoblot of Drp1 and Mitotracker Green imaging in one sgCTR and two sgDrp1 KPO CRISPR clonal cell lines. Scale = 10  $\mu$ m.



**A**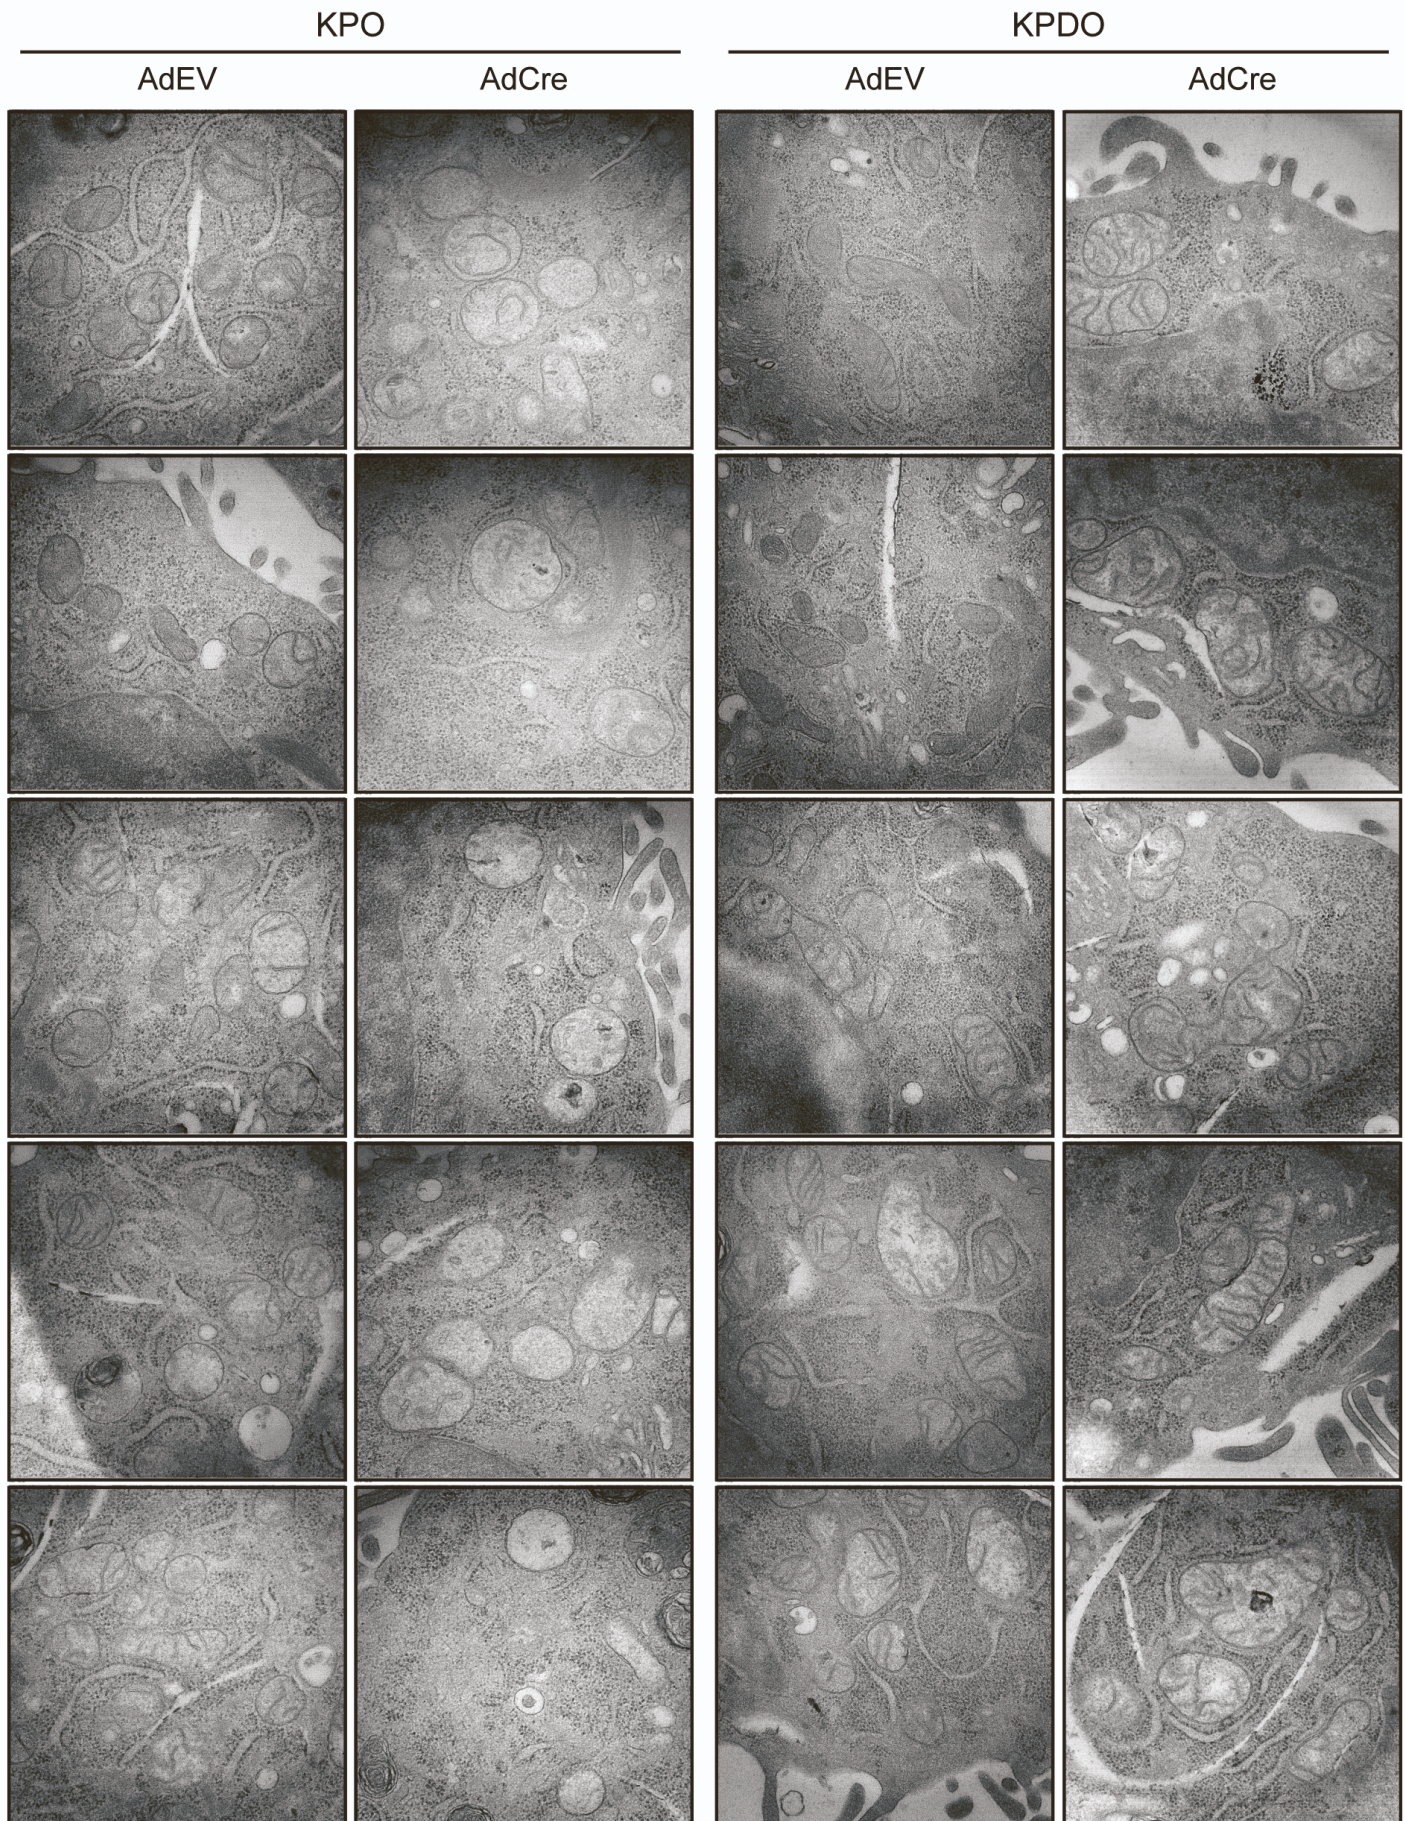

**Figure S6: Opa1 deletion impairs mitochondrial cristae morphology in a Drp1-dependent manner. Related to Figure 6.**

A. Additional TEM images of cristae morphology in AdEV- or AdCre-infected KPO and KPDO cells. Magnification = 30k. Scale = 200 nm.



**Table S1: KPDO Mouse Genotyping Primers (5'-3')**

|                                                          |
|----------------------------------------------------------|
| <i>Kras</i> F1: CTAGCCACCATGGCTTGAGT                     |
| <i>Kras</i> F2: ATGTCTTTCCCCAGCACAGT                     |
| <i>Kras</i> R: TCCGAATTCAGTGACTIONACAGATG                |
| <i>Trp53</i> F: CACAAAAACAGGTTAAACCCAG                   |
| <i>Trp53</i> R: AGCACATAGGAGGCAGAGAC                     |
| <i>Dnm1l</i> F: ACCAAAGTAAGGAATAGCTGTTG                  |
| <i>Dnm1l</i> R: ATGCGCTGATAATACTATCAACC                  |
| <i>Opa1</i> F: TTAAGACACCCCAAGAGCTTGC                    |
| <i>Opa1</i> R: CCAGCTTAGATCCCATTTGTTGACAG                |
| <i>Opa1</i> Recombined F: CCATCTGTGTAGTGAACCTACTG        |
| <i>Opa1</i> Recombined R: TGACGAGGCGTCCGAAGAACGGATCCAAGC |

**Table S2: CRISPR Guide RNA Sequences (5'-3')**

|                                                                |
|----------------------------------------------------------------|
| sgCTR: GTATTACTGATATTGGTGGG                                    |
| Mouse <i>Opa1</i> sg1: GCGCCTGCGAGAGCTCGACA                    |
| Mouse <i>Opa1</i> /Human <i>OPA1</i> sg4: AAATGTAGCCAGTCCAAGCA |
| Human <i>OPA1</i> sg3: TCAGTGGAAAGATATGATAC                    |
| Mouse <i>Dnm1l</i> sg1: GCACAAATAAAGCAGGACGG                   |
| Mouse <i>Dnm1l</i> sg2: AATCGTGTTACAATACTCTG                   |
| Mouse <i>Mfn1</i> sg: GCTCAAGGTTGTAAGTCCGT                     |
| Mouse <i>Mfn2</i> sg: CCGAGGCAGACGCATCCCAG                     |
|                                                                |

**Table S3: mtDNA:nDNA Analysis qPCR Primers (5'-3')**

|                                                |
|------------------------------------------------|
| <i>Hk2</i> F: GCCAGCCTCTCCTGATTTTAGTGT         |
| <i>Hk2</i> R: GGGAACACAAAAGACCTCTTCTGG         |
| <i>mt-Nd1</i> F: CTAGCAGAAACAAACCGGGC          |
| <i>mt-Nd1</i> R: CCGGCTGCGTATTCTACGTT          |
| <i>mt-Rnr2 (16S)</i> F: CCGCAAGGGAAAGATGAAAGAC |
| <i>mt-Rnr2 (16S)</i> R: TCGTTTGTTTTCGGGGTTTC   |
